# Supplementary material for: A uniform few-layered carbon coating derived from self-assembled carboxylate monolayers capable of promoting the rate properties and durability of commercial TiO2
Source: Royal Society of Chemistry journal article supplement (doi:10.1039/c9ra08141k), 2019-01-01
Supplement: c9ra08141k1.pdf [file c9ra08141k1.pdf]

## Supporting information

### Uniform few-layered carbon coating derived from the self-assembled carboxylate monolayers capable of promoting the rate properties and durability of commercial TiO<sub>2</sub>

Meng Huang<sup>a</sup>, Hui-Ling Zhu<sup>b</sup>, Yong-Xin Qi<sup>a</sup>, Ning Lun<sup>\*a</sup> and Yu-Jun Bai<sup>\*a</sup>

<sup>a</sup>Key Laboratory for Liquid-Solid Structural Evolution & Processing of Materials (Ministry of Education), Shandong University, Jinan 250061, PR China

<sup>b</sup>School of Materials Science and Engineering, Shandong University of Science and Technology, Qingdao, 266590, PR China

\*Tel/Fax: +86 0531 88392315. E-mail: byj97@sdu.edu.cn (Y.-J. Bai), lunning66@sdu.edu.cn

(N. Lun)

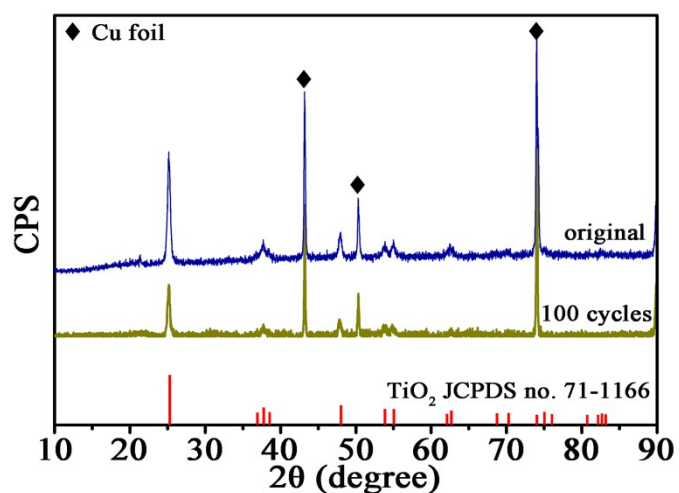

Fig. S1 XRD patterns of TiO<sub>2</sub>/C-30 before cycling and after 100 cycles at 0.1 A g<sup>-1</sup>.
